# Supplementary material
Source: bioRxiv or medRxiv preprint supplement (https://medrxiv.org/highwire/filestream/74292/field_highwire_adjunct_files/0/2020.03.19.20039248-1.pdf)
Supplement: Supplementary file [file 2020.03.19.20039248-1.pdf]

|                                                             |                          | Included patients<br>n = 41 | Excluded patients due<br>to incomplete specimen<br>collection<br>n= 5 | p           |
|-------------------------------------------------------------|--------------------------|-----------------------------|-----------------------------------------------------------------------|-------------|
| <b>Age<sup>a</sup></b>                                      |                          | 53.9 (12.6)                 | 47.5 (12.0)                                                           | 0.78        |
| <b>BMI<sup>a</sup></b>                                      |                          | 25.8 (4.3)                  | 29.7 (9.8)                                                            | <b>0.11</b> |
| <b>Gender<sup>b</sup></b>                                   | <b>Male</b>              | 28 (68.3)                   | 2 (40)                                                                | 0.21        |
|                                                             | <b>Female</b>            | 13 (31.7)                   | 3 (60)                                                                |             |
| <b>Highest level of education<br/>achieved<sup>b#</sup></b> | <b>Less than year 12</b> | 23 (56.1)                   | 2 (40)                                                                | 0.19        |
|                                                             | <b>Year 12 or higher</b> | 17 (41.5)                   | 2 (40)                                                                |             |
| <b>Country of birth<sup>b#</sup></b>                        | <b>Australia</b>         | 29 (70.7)                   | 3 (60)                                                                | <b>0.67</b> |
|                                                             | <b>Overseas</b>          | 12 (29.3)                   | 1 (20)                                                                |             |

Supplementary Table 1.

Descriptive characteristics. Data are expressed as <sup>a</sup>mean (standard deviation) and <sup>b</sup>frequency (percentage). \*BMI = body mass index (kg/m<sup>2</sup>). # denotes missing data

|                                 |                | Included patients<br>n = 41 | Excluded patients due<br>to incomplete specimen<br>collection<br>n= 5 | P               |
|---------------------------------|----------------|-----------------------------|-----------------------------------------------------------------------|-----------------|
| <b>Hepatitis C genotype</b>     | <b>Unknown</b> | 2 (4.8)                     | 4 (80)                                                                | <b>&lt;0.01</b> |
|                                 | <b>1a</b>      | 10 (24.3)                   | -                                                                     |                 |
|                                 | <b>1b</b>      | 12 (29.3)                   | -                                                                     |                 |
|                                 | <b>3</b>       | 16 (39.0)                   | 1 (20)                                                                |                 |
|                                 | <b>4</b>       | 1 (2.4)                     | -                                                                     |                 |
| <b>Hepatitis B co-infection</b> |                | 3 (7.3)                     | 0                                                                     | 0.53            |

Supplementary Table 2.

Hepatitis C genotype and hepatitis B co-infection of patients with depression (study group) and without depression (control group). Data are expressed as frequency (percentage)

|                                                      | <b>Included patients<br/>n = 41</b> | <b>Excluded patients due<br/>to incomplete specimen<br/>collection<br/>n= 5</b> | <b>P</b>     |
|------------------------------------------------------|-------------------------------------|---------------------------------------------------------------------------------|--------------|
| <b>Comorbid cardiac disease</b>                      | 1 (2.4)                             | 2 (40)                                                                          | <b>0.028</b> |
| <b>Comorbid diabetes</b>                             | 4 (9.8)                             | 0                                                                               | 1.0          |
| <b>Comorbid arthritis</b>                            | 13 (31.7)                           | 1 (20)                                                                          | 1.0          |
| <b>Comorbid thyroid disease</b>                      | 2 (4.9)                             | 0                                                                               | 1.0          |
| <b>Past diagnosis of major depression#</b>           | 23 (56.1)                           | 1 (20)                                                                          | <b>0.18</b>  |
| <b>Past diagnosis of bipolar affective disorder#</b> | 1 (2.4)                             | 0                                                                               | <b>1.0</b>   |
| <b>Past diagnosis of schizophrenia#</b>              | 5 (12.2)                            | 0                                                                               | <b>1.0</b>   |
| <b>Past diagnosis of anxiety#</b>                    | 11 (26.8)                           | 1 (20)                                                                          | <b>1.0</b>   |
| <b>Past suicide attempt#</b>                         | 4 (9.7)                             | 0                                                                               | <b>1.0</b>   |

Supplementary Table 3.

Comorbidities and psychiatric history. Data are expressed as frequency (percentage). # denotes missing data
